# Supplementary material
Source: PubMed Central journal article supplement (PMC8501231)
Supplement: NIHMS1712234-supplement-eTables.pdf [file NIHMS1712234-supplement-eTables.pdf]

**eTable 1. Characteristics of Women in the Sister Study at Baseline (2003 to 2009) Stratified by Race/Ethnicity**

| <b>Baseline characteristics</b>                                  | <b>White</b>  | <b>Black</b> | <b>Hispanic</b> |
|------------------------------------------------------------------|---------------|--------------|-----------------|
| No. of participants (%)                                          | 29 720 (88.7) | 2151 (6.4)   | 1626 (4.9)      |
| <b>Sociodemographic</b>                                          |               |              |                 |
| Mean age, years                                                  | 54.3 ± 8.8    | 51.2 ± 7.9   | 51.2 ± 8.7      |
| Age <54 years                                                    | 14 735 (49.6) | 1376 (64.0)  | 1036 (63.7)     |
| Age ≥54 years                                                    | 14 985 (50.4) | 775 (36.0)   | 560 (36.3)      |
| Marital status                                                   |               |              |                 |
| Single/never married                                             | 1348 (4.5)    | 309 (14.4)   | 117 (7.2)       |
| Married/living as married                                        | 23 557 (79.3) | 1161 (54.0)  | 1153 (70.9)     |
| Separated/widowed/divorced                                       | 4813 (16.2)   | 679 (31.6)   | 356 (21.9)      |
| Educational attainment                                           |               |              |                 |
| ≤high school                                                     | 3971 (13.4)   | 178 (8.3)    | 338 (20.8)      |
| >high school                                                     | 25 746 (86.6) | 1973 (91.7)  | 1288 (79.2)     |
| Annual household income <sup>a</sup>                             | 43.7 ± 27.1   | 42.2 ± 28.3  | 30.7 ± 25.1     |
| Unemployed (yes)                                                 | 9053 (30.8)   | 393 (18.4)   | 542 (33.6)      |
| Work hours                                                       |               |              |                 |
| <20 hours/week                                                   | 10 796 (36.7) | 443 (20.8)   | 626 (38.8)      |
| ≥20 hours/week                                                   | 18 608 (63.3) | 1687 (79.2)  | 987 (61.2)      |
| <b>Health behaviors</b>                                          |               |              |                 |
| Smoker status                                                    |               |              |                 |
| Never                                                            | 16 582 (55.8) | 1465 (68.1)  | 1146 (70.5)     |
| Former                                                           | 10 769 (36.2) | 492 (22.9)   | 362 (22.3)      |
| Current                                                          | 2365 (8.0)    | 194 (9.0)    | 117 (7.2)       |
| Alcohol consumption                                              |               |              |                 |
| Current/former                                                   | 28 909 (97.3) | 2034 (94.6)  | 1475 (90.8)     |
| Binge drinking <sup>b</sup>                                      | 5840 (19.7)   | 201 (9.3)    | 277 (17.1)      |
| Physical activity, MET hours/week                                | 16.1 ± 18.9   | 12.8 ± 17.7  | 11.6 ± 16.9     |
| Healthy Eating Index score <sup>c</sup>                          | 72.2 ± 9.5    | 70.8 ± 9.5   | 70.2 ± 10.0     |
| Ever use of sleep medication, melatonin, or antihistamines (yes) | 10 042 (34.1) | 592 (29.3)   | 515 (32.7)      |
| Antidepressant use                                               |               |              |                 |
| Never/no baseline depression                                     | 24 050 (81.0) | 1880 (87.4)  | 1318 (81.1)     |
| Former                                                           | 1949 (6.6)    | 136 (6.3)    | 150 (9.2)       |
| Current                                                          | 3694 (12.4)   | 135 (6.3)    | 158 (9.7)       |
| <b>Clinical characteristic</b>                                   |               |              |                 |
| BMI, kg/m <sup>2</sup>                                           | 26.2 ± 5.4    | 29.7 ± 6.4   | 27.3 ± 5.3      |
| Underweight: <18.5                                               | 469 (1.6)     | 13 (0.6)     | 14 (0.9)        |
| Normal: 18.5 to 24.9                                             | 14 160 (47.7) | 497 (23.1)   | 596 (36.7)      |
| Overweight: 25 to 29.9                                           | 9175 (30.9)   | 754 (35.1)   | 611 (37.6)      |
| Obese: ≥30                                                       | 5905 (19.9)   | 886 (41.2)   | 405 (24.9)      |
| Waist-to-hip ratio                                               | 0.79 ± 0.08   | 0.82 ± 0.08  | 0.81 ± 0.07     |
| Menopausal status                                                |               |              |                 |
| Premenopausal                                                    | 11 640 (39.2) | 1099 (51.2)  | 798 (49.1)      |
| Postmenopausal                                                   | 18 073 (60.8) | 1047 (48.8)  | 826 (50.9)      |
| Systolic BP, mm Hg                                               | 111.1 ± 12.2  | 114.9 ± 12.2 | 110.5 ± 11.7    |
| Diastolic BP, mm Hg                                              | 70.6 ± 8.2    | 73.2 ± 8.4   | 70.4 ± 8.1      |
| Cardiovascular disease                                           | 5646 (19.9)   | 409 (19.3)   | 242 (15.3)      |

|                                                 |               |             |             |
|-------------------------------------------------|---------------|-------------|-------------|
| Hypercholesterolemia                            | 7929 (27.0)   | 521 (24.3)  | 493 (30.4)  |
| Diabetes                                        | 644 (2.2)     | 105 (4.9)   | 85 (5.3)    |
| Clinical depression                             | 5960 (22.5)   | 312 (15.4)  | 347 (23.1)  |
| <b>Sleep characteristics</b>                    |               |             |             |
| Sleep duration                                  | 7.2 ± 1.0     | 6.5 ± 1.2   | 6.9 ± 1.2   |
| ≤5 hours                                        | 1405 (4.7)    | 396 (18.6)  | 164 (10.1)  |
| >5 to <7 hours                                  | 6016 (20.3)   | 734 (34.4)  | 403 (24.9)  |
| 7 to 9 hours                                    | 21 973 (74.0) | 990 (46.4)  | 1034 (64.0) |
| >9 hours                                        | 282 (1.0)     | 15 (0.7)    | 16 (1.0)    |
| Inconsistent weekly sleep patterns <sup>d</sup> | 3820 (12.9)   | 438 (20.4)  | 329 (20.3)  |
| Sleep debt ≥2 hours <sup>e</sup>                | 6640 (22.7)   | 680 (33.1)  | 499 (31.6)  |
| Napping ≥3 times/week                           | 2551 (8.6)    | 245 (11.4)  | 184 (11.3)  |
| Insomnia symptoms <sup>f</sup>                  | 7106 (23.9)   | 686 (32.0)  | 540 (33.3)  |
| Difficulty falling asleep <sup>g</sup>          | 4373 (14.7)   | 572 (26.6)  | 436 (26.9)  |
| Difficulty staying asleep <sup>h</sup>          | 3801 (12.8)   | 228 (10.6)  | 209 (12.9)  |
| Insomnia symptoms and short sleep               | 2809 (9.6)    | 447 (21.1)  | 272 (17.0)  |
| Cumulative sleep score <sup>i</sup>             | 0.95 ± 1.11   | 1.52 ± 1.24 | 1.33 ± 1.24 |
| 0                                               | 13 417 (45.4) | 502 (23.7)  | 508 (31.6)  |
| 1                                               | 8622 (29.1)   | 661 (31.2)  | 468 (29.1)  |
| 2                                               | 4440 (15.0)   | 507 (23.9)  | 349 (21.7)  |
| 3                                               | 2010 (6.8)    | 285 (13.4)  | 176 (10.9)  |
| 4                                               | 995 (3.4)     | 142 (6.7)   | 96 (6.0)    |
| 5                                               | 103 (0.4)     | 25 (1.2)    | 13 (0.8)    |

Values are no. of participants (%) or mean ± standard deviation unless stated otherwise. No., number; MET, metabolic equivalent of task; BMI, body mass index; BP, Blood pressure.

<sup>a</sup> Annual income scaled to 1000 US Dollars.

<sup>b</sup> Binge drinking: ≥4 per sitting.

<sup>c</sup> Healthy Eating Index scores range from 0-100 with higher scores indicating a healthier diet.

<sup>d</sup> Inconsistent weekly sleep patterns (yes vs. no) were defined as participants reporting inconsistent wake-up times and bedtimes from week-to-week during the prior 6 weeks.

<sup>e</sup> Sleep debt was defined as the difference in sleep hours between the nights with the longest and shortest sleep durations and was dichotomized at ≥2 hours.

<sup>f</sup> Insomnia defined as difficulty falling asleep or difficulty staying asleep.

<sup>g</sup> Difficulty falling asleep defined as taking ≥30 minutes to fall asleep.

<sup>h</sup> Difficulty staying asleep defined as waking up 3 or more times per night at least 3 nights per week.

<sup>i</sup> Cumulative sleep score is the summation of the following symptoms of poor sleep: short sleep or long sleep, inconsistent weekly sleep patterns, sleep debt ≥2 hours, napping ≥3 times per week, and insomnia.

**eTable 2: Hazard Ratios for Sleep Duration and Hypertension Risk in US Women by Age Group among Premenopausal and Postmenopausal Women, the Sister Study (March 2003 - September 2018) <sup>a</sup>**

|                                                           | Age <54 years                   |                          | Age ≥54 years                   |                          | P for interaction |
|-----------------------------------------------------------|---------------------------------|--------------------------|---------------------------------|--------------------------|-------------------|
|                                                           | No. with event/<br>person-years | HR (95% CI) <sup>b</sup> | No. with event/<br>person-years | HR (95% CI)              |                   |
| <b>Sleep duration, Premenopausal</b>                      |                                 |                          |                                 |                          | 0.7484            |
| ≤5 hours                                                  | 153/5457                        | 1.10 (0.92, 1.32)        | 9/363                           | 0.58 (0.25, 1.37)        |                   |
| >5 to <7                                                  | 534/24 664                      | 1.10 (0.99, 1.22)        | 36/1253                         | 1.06 (0.70, 1.60)        |                   |
| 7 to <9 hours                                             | 1548/90 646                     | 1.00                     | 113/4665                        | 1.00                     |                   |
| ≥9 hours                                                  | 30/977                          | 1.36 (0.92, 2.00)        | 0/27                            | n/a                      |                   |
| <b>Sleep duration, Postmenopausal</b>                     |                                 |                          |                                 |                          | 0.3560            |
| ≤5 hours                                                  | 92/3201                         | 1.12 (0.88, 1.42)        | 227/7261                        | 1.01 (0.87, 1.16)        |                   |
| >5 to <7                                                  | 239/9388                        | 1.08 (0.92, 1.27)        | 802/28 206                      | 0.98 (0.90, 1.07)        |                   |
| 7 to <9 hours                                             | 553/26 962                      | 1.00                     | 2735/99 138                     | 1.00                     |                   |
| ≥9 hours                                                  | 7/213                           | 1.49 (0.70, 3.17)        | 45/1323                         | 1.12 (0.83, 1.52)        |                   |
| <b>Inconsistent weekly sleep patterns, Premenopausal</b>  |                                 |                          |                                 |                          | 0.8880            |
| No                                                        | 1999/108 840                    | 1.00                     | 135/5501                        | 1.00                     |                   |
| Yes                                                       | 268/12 782                      | 0.95 (0.83, 1.09)        | 23/807                          | 0.92 (0.56, 1.52)        |                   |
| <b>Inconsistent weekly sleep patterns, Postmenopausal</b> |                                 |                          |                                 |                          | 0.2304            |
| No                                                        | 749/34 732                      | 1.00                     | 3184/115 360                    | 1.00                     |                   |
| Yes                                                       | 143/5059                        | 1.10 (0.90, 1.33)        | 632/20 702                      | 0.96 (0.87, 1.05)        |                   |
| <b>Sleep debt ≥2 hours, Premenopausal</b>                 |                                 |                          |                                 |                          | 0.7909            |
| No                                                        | 1572/88 398                     | 1.00                     | 110/4645                        | 1.00                     |                   |
| Yes                                                       | 651/31 998                      | 1.06 (0.95, 1.17)        | 46/1579                         | 1.23 (0.81, 1.88)        |                   |
| <b>Sleep debt ≥2 hours, Postmenopausal</b>                |                                 |                          |                                 |                          | 0.2238            |
| No                                                        | 614/29 347                      | 1.00                     | 2976/107 477                    | 1.00                     |                   |
| Yes                                                       | 251/9716                        | 1.07 (0.89, 1.27)        | 777/26 453                      | 1.03 (0.92, 1.15)        |                   |
| <b>Napping ≥3 times/ week, Premenopausal</b>              |                                 |                          |                                 |                          | <b>0.0433</b>     |
| No                                                        | 2072/113 735                    | 1.00                     | 137/5875                        | 1.00                     |                   |
| Yes                                                       | 196/8158                        | 1.10 (0.94, 1.28)        | 21/434                          | <b>1.82 (1.12, 2.95)</b> |                   |
| <b>Napping ≥3 times/ week, Postmenopausal</b>             |                                 |                          |                                 |                          | <b>0.0199</b>     |
| No                                                        | 800/36 772                      | 1.00                     | 3409/122 255                    | 1.00                     |                   |
| Yes                                                       | 94/3071                         | 1.19 (0.95, 1.50)        | 412/13 931                      | 0.90 (0.81, 1.01)        |                   |
| <b>Insomnia symptoms, Premenopausal</b>                   |                                 |                          |                                 |                          | 0.6234            |
| No                                                        | 1666/97 521                     | 1.00                     | 113/4953                        | 1.00                     |                   |
| Yes                                                       | 602/24 300                      | <b>1.22 (1.10, 1.35)</b> | 45/1345                         | 1.36 (0.93, 1.98)        |                   |
| <b>Insomnia symptoms, Postmenopausal</b>                  |                                 |                          |                                 |                          | 0.1112            |
| No                                                        | 595/28 588                      | 1.00                     | 2780/100 615                    | 1.00                     |                   |
| Yes                                                       | 296/11 192                      | 1.11 (0.96, 1.29)        | 1033/35 331                     | 1.01 (0.93, 1.09)        |                   |

|                                                          |              |                                       |              |                                |               |
|----------------------------------------------------------|--------------|---------------------------------------|--------------|--------------------------------|---------------|
| <b>Difficulty falling asleep, Premenopausal</b>          |              |                                       |              |                                | 0.1950        |
| No                                                       | 1852/105 731 | 1.00                                  | 128/5562     | 1.00                           |               |
| Yes                                                      | 417/16 118   | <b>1.18 (1.05, 1.32)</b>              | 30/736       | <b>1.67 (1.07, 2.61)</b>       |               |
| <b>Difficulty falling asleep, Postmenopausal</b>         |              |                                       |              |                                | 0.0541        |
| No                                                       | 685/32 727   | 1.00                                  | 3146/114 134 | 1.00                           |               |
| Yes                                                      | 207/7037     | 1.18 (1.00, 1.40)                     | 669/21 791   | 1.02 (0.94, 1.12)              |               |
| <b>Difficulty staying asleep, Premenopausal</b>          |              |                                       |              |                                | 0.6985        |
| No                                                       | 1985/110 665 | 1.00                                  | 136/5558     | 1.00                           |               |
| Yes                                                      | 283/11 168   | <b>1.27 (1.11, 1.44)</b>              | 22/750       | 1.14 (0.70, 1.85)              |               |
| <b>Difficulty staying asleep, Postmenopausal</b>         |              |                                       |              |                                | 0.2444        |
| No                                                       | 740/33 797   | 1.00                                  | 3269/116 882 | 1.00                           |               |
| Yes                                                      | 152/6017     | 1.13 (0.94, 1.35)                     | 547/19 178   | 1.02 (0.93, 1.12)              |               |
| <b>Short sleep and insomnia symptoms, Premenopausal</b>  |              |                                       |              |                                | 0.4012        |
| No                                                       | 1944/110 696 | 1.00                                  | 141/5720     | 1.00                           |               |
| Yes                                                      | 290/9984     | <b>1.30 (1.14, 1.48)</b>              | 17/551       | 0.96 (0.53, 1.75)              |               |
| <b>Short sleep and insomnia symptoms, Postmenopausal</b> |              |                                       |              |                                | <b>0.0205</b> |
| No                                                       | 723/34 298   | 1.00                                  | 3331/120 268 | 1.00                           |               |
| Yes                                                      | 158/5180     | <b>1.22 (1.02, 1.47)</b>              | 424/14 061   | 1.01 (0.90, 1.12)              |               |
| <b>Cumulative sleep score, Premenopausal</b>             |              | <b>1.05 (1.01, 1.09) <sup>c</sup></b> |              | 1.10 (0.95, 1.27) <sup>d</sup> | 0.5825        |
| <b>Cumulative sleep score, Postmenopausal</b>            |              | <b>1.07 (1.00, 1.13) <sup>e</sup></b> |              | 0.98 (0.96, 1.01) <sup>f</sup> | <b>0.0031</b> |

HR, hazard ratio; CI, confidence interval

<sup>a</sup> All models adjusted for age, race/ethnicity, marital status, income level, employment status, educational attainment, smoking status, alcohol use, binge drinking, physical activity, Healthy Eating Index, BMI, waist-to-hip ratio, diabetes, antidepressant use, and inconsistent weekly sleep patterns (for sleep debt analyses only).

<sup>b</sup> Bolded estimates and p-values are significant at the 0.05 significance level.

<sup>c</sup> Number of events/person-years for all values of the cumulative sleep score for premenopausal participants age <54 years: Score of 0 = 909 events/57 122 person-years; 1 = 676/34 750; 2 = 372/18 126; 3 = 189/7943; 4 = 97/3043; 5 = 17/389.

<sup>d</sup> Number of events/person-years for all values of the cumulative sleep score for premenopausal participants age ≥54 years: Score of 0 = 53 events/2833 person-years; 1 = 54/1929; 2 = 31/868; 3 = 15/444; 4 = 4/210; 5 = 1/2.

<sup>e</sup> Number of events/person-years for all values of the cumulative sleep score for postmenopausal participants age <54 years: Score of 0 = 292 events/15 845 person-years; 1 = 265/12 311; 2 = 187/6626; 3 = 83/3065; 4 = 52/1575; 5 = 7/216.

<sup>f</sup> Number of events/person-years for all values of the cumulative sleep score for postmenopausal participants age ≥54 years: Score of 0 = 1606 events/59 698 person-years; 1 = 1117/39 061; 2 = 599/21 154; 3 = 284/9841; 4 = 168/5247; 5 = 20/472.

**eTable 3: Hazard Ratios for Multiple Sleep Dimensions and Hypertension Risk by Sleep Medication, Melatonin, and Antihistamine Use in the Sister Study (March 2003 - September 2018) <sup>a</sup>**

| Sleep dimensions                          | Sleep medication, melatonin, or antihistamine use |                                |                                 |                                | P for interaction |
|-------------------------------------------|---------------------------------------------------|--------------------------------|---------------------------------|--------------------------------|-------------------|
|                                           | Never (N=21 862)                                  |                                | Ever (N=11 149)                 |                                |                   |
|                                           | No. with event/<br>person-years                   | HR (95% CI) <sup>b</sup>       | No. with event/<br>person-years | HR (95% CI)                    |                   |
| <b>Sleep duration</b>                     |                                                   |                                |                                 |                                | <b>0.0061</b>     |
| ≤5 hours                                  | 266/8583                                          | <b>1.14 (1.00, 1.31)</b>       | 209/7408                        | 0.93 (0.80, 1.09)              |                   |
| >5 to <7 hours                            | 963/41 222                                        | 0.97 (0.90, 1.05)              | 624/21 323                      | <b>1.13 (1.03, 1.24)</b>       |                   |
| 7 to <9 hours                             | 3188/150 424                                      | 1.00                           | 1692/68 589                     | 1.00                           |                   |
| >9 hours                                  | 43/1422                                           | 1.18 (0.86, 1.60)              | 39/1104                         | 1.22 (0.87, 1.70)              |                   |
| <b>Inconsistent weekly sleep patterns</b> |                                                   |                                |                                 |                                | 0.2569            |
| No                                        | 3915/179 249                                      | 1.00                           | 2070/82 113                     | 1.00                           |                   |
| Yes                                       | 549/22 334                                        | 0.92 (0.84, 1.01)              | 501/16 428                      | 1.00 (0.90, 1.12)              |                   |
| <b>Sleep debt ≥2 hours</b>                |                                                   |                                |                                 |                                | 0.8051            |
| No                                        | 3402/155 942                                      | 1.00                           | 1807/71 485                     | 1.00                           |                   |
| Yes                                       | 1020/44 016                                       | 1.07 (0.98, 1.16)              | 671/24 615                      | 1.03 (0.92, 1.16)              |                   |
| <b>Napping ≥3 times/ week</b>             |                                                   |                                |                                 |                                | 0.2412            |
| No                                        | 4043/185 573                                      | 1.00                           | 2286/89 739                     | 1.00                           |                   |
| Yes                                       | 423/16 300                                        | 0.96 (0.87, 1.07)              | 290/8939                        | 1.08 (0.94, 1.23)              |                   |
| <b>Insomnia symptoms</b>                  |                                                   |                                |                                 |                                | 0.0833            |
| No                                        | 3473/164 957                                      | 1.00                           | 1600/63 879                     | 1.00                           |                   |
| Yes                                       | 988/36 693                                        | <b>1.12 1.04, 1.20)</b>        | 971/34 656                      | 1.02 (0.94, 1.11)              |                   |
| <b>Difficulty falling asleep</b>          |                                                   |                                |                                 |                                | <b>0.0418</b>     |
| No                                        | 3853/180 406                                      | 1.00                           | 1872/74 587                     | 1.00                           |                   |
| Yes                                       | 610/21 279                                        | <b>1.15 (1.05, 1.26)</b>       | 701/23 906                      | 1.01 (0.92, 1.11)              |                   |
| <b>Difficulty staying asleep</b>          |                                                   |                                |                                 |                                | 0.7782            |
| No                                        | 3947/181 937                                      | 1.00                           | 2095/81 709                     | 1.00                           |                   |
| Yes                                       | 516/19 834                                        | 1.08 (0.98, 1.18)              | 477/16 860                      | 1.11 (1.00, 1.23)              |                   |
| <b>Insomnia symptoms and short sleep</b>  |                                                   |                                |                                 |                                | 0.9010            |
| No                                        | 3983/185 219                                      | 1.00                           | 2064/82 454                     | 1.00                           |                   |
| Yes                                       | 428/14 756                                        | 1.10 (0.99, 1.22)              | 455/14 692                      | <b>1.12 (1.01, 1.25)</b>       |                   |
| <b>Cumulative poor sleep score</b>        |                                                   | 1.01 (0.98, 1.04) <sup>c</sup> |                                 | 1.02 (0.99, 1.06) <sup>d</sup> | 0.6948            |

CI=confidence interval

<sup>a</sup> All models adjusted for age, race/ethnicity, marital status, income level, employment status, educational attainment, smoking status, alcohol use, binge drinking, physical activity, Healthy Eating Index score, BMI, waist-to-hip ratio, diabetes, antidepressant use, and inconsistent weekly sleep patterns (for sleep debt analyses only).

<sup>b</sup> Bolded estimates and p-values are significant at the 0.05 significance level.

<sup>c</sup> Number of events/person-years for all values of the cumulative poor sleep score for participants without sleep medication or melatonin use: Score of 0 = 1969 events/98 272 person-years; 1 = 1338/57 225; 2 = 683/28 445; 3 = 301/11 966; 4 = 134/4610; 5 = 24/557.

<sup>d</sup> Number of events/person-years for all values of the cumulative poor sleep score for participants with sleep medication or melatonin use: Score of 0 = 852 events/35 906 person-years; 1 = 746/29 717; 2 = 17 664; 3 = 255/8934; 4 = 185/5354; 5 = 21/508.

**eTable 4: Hazard Ratios for Multiple Sleep Dimensions and Hypertension Risk in the Sister Study (March 2003 - September 2018), excluding those with blood pressure  $\geq$  130/80 mm Hg at baseline or reporting medication use for high blood pressure at baseline, N=25,400**

| Sleep dimensions                                | Number of events/<br>person-years | Model 1: Adjusted for demographics <sup>a</sup> |                  | Model 2: Adjusted for demographics and lifestyle <sup>b</sup> |              | Model 3: Fully adjusted <sup>c</sup> |              |
|-------------------------------------------------|-----------------------------------|-------------------------------------------------|------------------|---------------------------------------------------------------|--------------|--------------------------------------|--------------|
|                                                 |                                   | HR (95% CI) <sup>d</sup>                        | P value          | HR (95% CI)                                                   | P value      | HR (95% CI)                          | P value      |
| <b>Sleep duration</b>                           |                                   |                                                 |                  |                                                               |              |                                      | 0.420        |
| ≤5 hours                                        | 252/12 423                        | 1.09 (0.95, 1.24)                               |                  | 1.03 (0.90, 1.18)                                             |              | 1.00 (0.87, 1.15)                    |              |
| >5 to <7 hours                                  | 902/50 319                        | 1.05 (0.98, 1.14)                               |                  | 1.03 (0.95, 1.12)                                             |              | 1.02 (0.94, 1.11)                    |              |
| 7 to <9 hours                                   | 2860/178 654                      | 1.00                                            |                  | 1.00                                                          |              | 1.00                                 |              |
| >9 hours                                        | 48/1914                           | <b>1.51 (1.13, 2.02)</b>                        | <b>0.019</b>     | <b>1.40 (1.04, 1.88)</b>                                      | 0.139        | 1.28 (0.95, 1.71)                    |              |
| <b>Inconsistent weekly sleep patterns</b>       |                                   |                                                 |                  |                                                               |              |                                      | 0.913        |
| No                                              | 3467/213 437                      | 1.00                                            |                  | 1.00                                                          |              | 1.00                                 |              |
| Yes                                             | 600/29 818                        | <b>1.12 (1.03, 1.23)</b>                        | <b>0.012</b>     | 1.07 (0.97, 1.17)                                             | 0.177        | 1.01 (0.92, 1.10)                    |              |
| <b>Sleep debt <math>\geq</math> 2 hours</b>     |                                   |                                                 |                  |                                                               |              |                                      | 0.106        |
| No                                              | 3009/185 437                      | 1.00                                            |                  | 1.00                                                          |              | 1.00                                 |              |
| Yes                                             | 984/54 756                        | <b>1.15 (1.05, 1.26)</b>                        | <b>0.002</b>     | <b>1.11 (1.01, 1.21)</b>                                      | <b>0.027</b> | 1.08 (0.98, 1.18)                    |              |
| <b>Napping <math>\geq</math> 3 times/week</b>   |                                   |                                                 |                  |                                                               |              |                                      | 0.447        |
| No                                              | 3662/224 195                      | 1.00                                            |                  | 1.00                                                          |              | 1.00                                 |              |
| Yes                                             | 409/19 426                        | <b>1.14 (1.02, 1.27)</b>                        | <b>0.016</b>     | 1.11 (1.00, 1.24)                                             | 0.052        | 1.04 (0.94, 1.16)                    |              |
| <b>Insomnia symptoms</b>                        |                                   |                                                 |                  |                                                               |              |                                      | <b>0.042</b> |
| No                                              | 2974/187 321                      | 1.00                                            |                  | 1.00                                                          |              | 1.00                                 |              |
| Yes                                             | 1093/56 046                       | <b>1.15 (1.07, 1.23)</b>                        | <b>&lt;0.001</b> | <b>1.10 (1.03, 1.19)</b>                                      | <b>0.008</b> | <b>1.08 (1.00, 1.16)</b>             |              |
| <b>Difficulty falling asleep</b>                |                                   |                                                 |                  |                                                               |              |                                      | <b>0.023</b> |
| No                                              | 3337/207 990                      | 1.00                                            |                  | 1.00                                                          |              | 1.00                                 |              |
| Yes                                             | 733/35 390                        | <b>1.19 (1.09, 1.29)</b>                        | <b>&lt;0.001</b> | <b>1.14 (1.04, 1.24)</b>                                      | <b>0.003</b> | <b>1.10 (1.01, 1.20)</b>             |              |
| <b>Difficulty staying asleep</b>                |                                   |                                                 |                  |                                                               |              |                                      | <b>0.038</b> |
| No                                              | 3504/214 715                      | 1.00                                            |                  | 1.00                                                          |              | 1.00                                 |              |
| Yes                                             | 563/28 762                        | <b>1.15 (1.05, 1.26)</b>                        | <b>0.003</b>     | <b>1.11 (1.01, 1.22)</b>                                      | <b>0.028</b> | <b>1.10 (1.01, 1.21)</b>             |              |
| <b>Insomnia symptoms and short sleep</b>        |                                   |                                                 |                  |                                                               |              |                                      | 0.089        |
| No                                              | 3524/217 926                      | 1.00                                            |                  | 1.00                                                          |              | 1.00                                 |              |
| Yes                                             | 484/23 175                        | <b>1.15 (1.04, 1.27)</b>                        | <b>0.007</b>     | <b>1.11 (1.00, 1.22)</b>                                      | <b>0.049</b> | 1.09 (0.99, 1.21)                    |              |
| <b>Cumulative poor sleep score <sup>e</sup></b> |                                   | <b>1.07 (1.04, 1.10)</b>                        | <b>&lt;0.001</b> | <b>1.05 (1.02, 1.08)</b>                                      | <b>0.001</b> | 1.02 (1.00, 1.05)                    | 0.094        |

HR=hazard ratio; CI=confidence interval

<sup>a</sup> Model 1: Demographic factors (age, race/ethnicity, marital status, income level, employment status, and educational attainment) and inconsistent weekly sleep patterns (for sleep debt analyses only).

<sup>b</sup> Model 2: Model 1 + smoking status, alcohol use, binge drinking, physical activity, and health eating index score.

<sup>c</sup> Model 3: Model 2 + comorbidities (BMI, waist-to-hip ratio, and diabetes) and antidepressant use.

<sup>d</sup> Bolded estimates and p-values are significant at the 0.05 significance level.

<sup>e</sup> Number of events/person-years for all values of the cumulative poor sleep score: Score of 0 = 1664 events/110 981 person-years; 1 = 1188/70 292; 2 = 690/36 923; 3 = 306/16 179; 4 = 178/7472; 5 = 23/731.
